# Supplementary material for: Multivariate functional neuroimaging analyses reveal that strength-dependent face expectations are represented in higher-level face-identity areas
Source: Springer Nature journal article supplement (doi:10.1038/s42003-023-04508-8), 2023-02-01
Supplement: MOESM1 [file 42003_2023_4508_MOESM1_ESM.pdf]

**Supplementary Information: Multivariate functional neuroimaging analyses  
reveal that strength-dependent face expectations are represented in higher-  
level face-identity areas**

**Authors:** Helen Blank<sup>1\*</sup>, Arjen Alink<sup>1</sup> & Christian Büchel<sup>1</sup>

<sup>1</sup>Department of Systems Neuroscience, University Medical Center Hamburg-Eppendorf,  
Hamburg 20246, Germany.

8     **Supplementary Information**

9     **Supplementary Figure 1. MDS Selection of three face images from behavioural pre-**  
10    **experiment.**

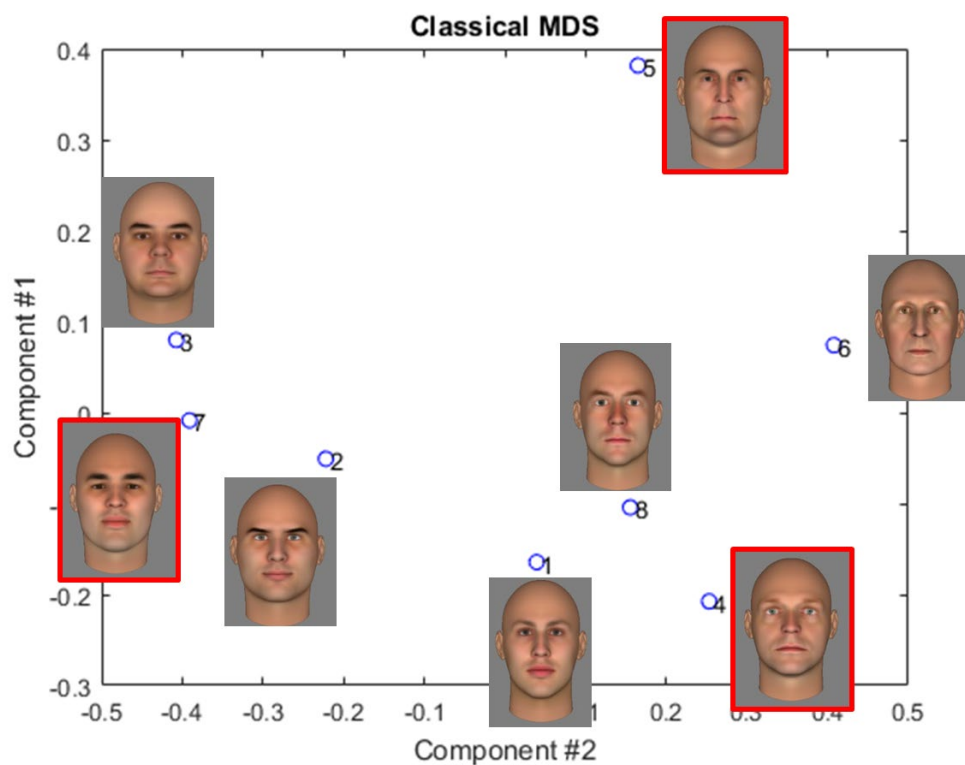

12     We conducted a behavioural pre-study (with different participants,  $n = 10$ ) to select three face images  
13     from a set of eight images, which were maximally and equally distinct from each other. To obtain an  
14     RDM with the perceptual distance between the eight face images, the number of dissimilar responses  
15     for each pair of faces was normalized by the number of all responses. We used maximum likelihood  
16     difference scaling (MLDS) on the RDM averaged over all participants to select three face images that  
17     were perceived as equally distant from each other.

Supplementary Figure 2. Individual participants' behavioural responses

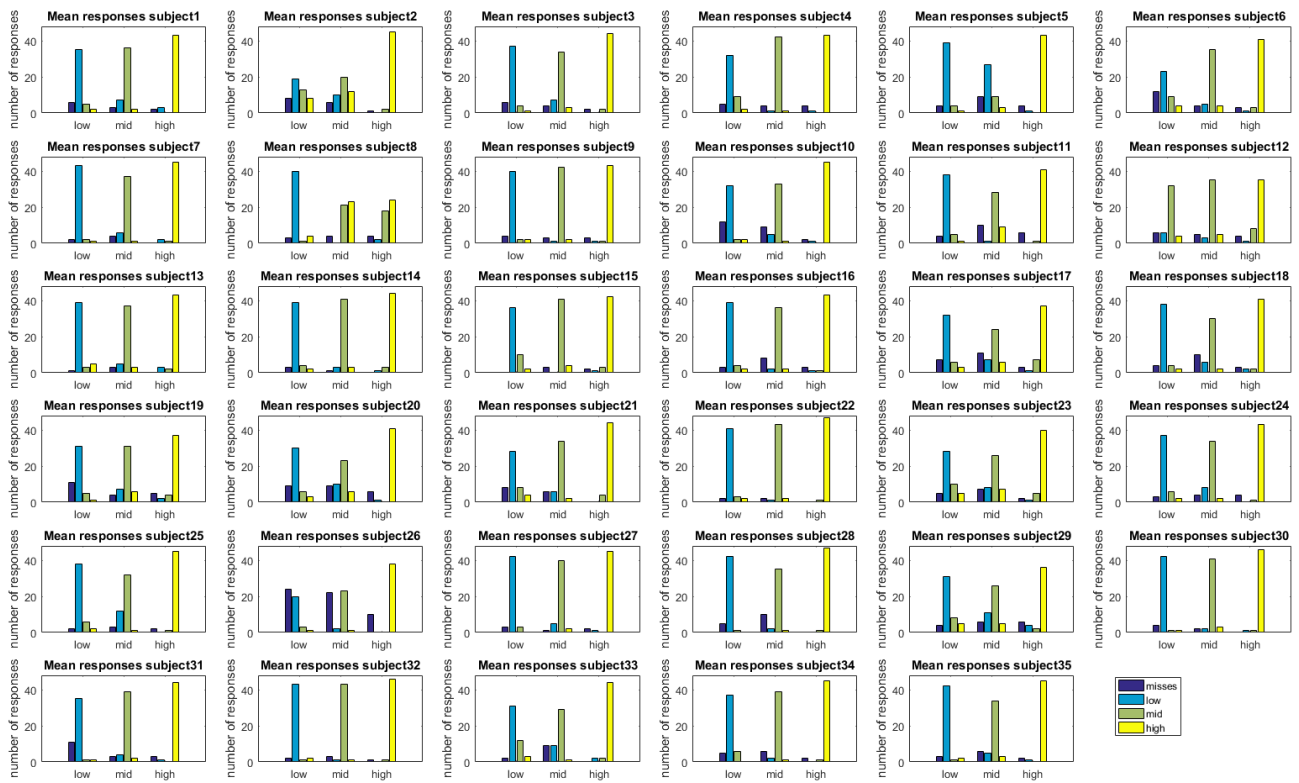

Behavioural responses show that most of the participants correctly associated scene cues and face images based on the three different probabilities (low in blue, mid in green, and high in yellow). Participants, 5, 8, 12, and 26 were excluded because of poor performance (i.e., less than 60 % correct across all three conditions or less than 20 % in a single condition).

**Supplementary Figure 3. Localizer for face-sensitive regions.**

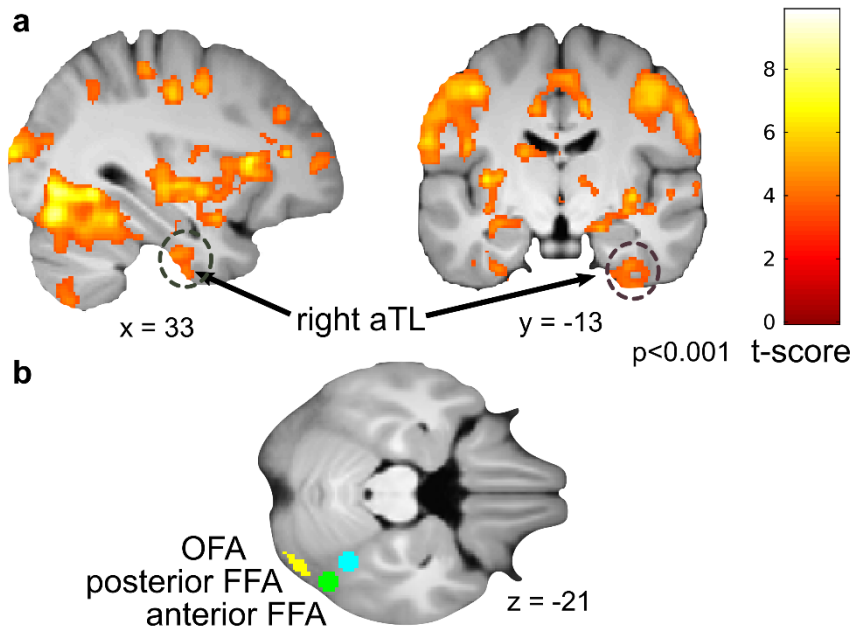

The univariate contrast “faces > senses” from the first localizer run was used to localize the face-sensitive regions of interest in the right hemisphere **a**) in the right anterior temporal lobe (in A depicted at  $p < 0.001$ , uncorrected), **b**) in the posterior and anterior fusiform face area (FFA), and the occipital face area (OFA, in B, all three regions were masked with the respective clusters from a probabilistic atlas containing OFA and the posterior and anterior FFA <sup>1</sup>).

33 **Supplementary Table 1. Localizer Faces > scenes,  $p < 0.001$ , uncorrected + cluster-corrected**  
34  **$p(\text{FWE}) < 0.05$**

| cluster<br>$p(\text{FWE-corr})$ | cluster<br>equivk | peak<br>$p(\text{FWE-corr})$ | peak T | peak<br>equivZ | x,y,z {mm}  | label                             |
|---------------------------------|-------------------|------------------------------|--------|----------------|-------------|-----------------------------------|
| <0.001                          | 43635             | 0.000                        | 9.84   | 6.47           | 28 -73 -8   | occipital fusiform<br>gyrus       |
|                                 |                   | 0.000                        | 9.47   | 6.35           | 12 -98 4    |                                   |
|                                 |                   | 0.000                        | 9.31   | 6.29           | 12 -80 -12  |                                   |
| <0.001                          | 13200             | 0.005                        | 7.40   | 5.50           | -22 -1 -20  | amygdala                          |
|                                 |                   | 0.009                        | 7.17   | 5.39           | -34 -14 6   |                                   |
|                                 |                   | 0.010                        | 7.14   | 5.38           | -40 14 -8   |                                   |
| <0.001                          | 15162             | 0.007                        | 7.30   | 5.46           | 33 18 10    | frontal operculum                 |
|                                 |                   | 0.014                        | 6.98   | 5.30           | 27 -1 -19   |                                   |
|                                 |                   | 0.029                        | 6.64   | 5.14           | 32 -4 -6    |                                   |
| <0.001                          | 6709              | 0.010                        | 7.13   | 5.38           | 6 11 34     | middle cingulate<br>gyrus         |
|                                 |                   | 0.013                        | 7.01   | 5.32           | 8 2 36      |                                   |
|                                 |                   | 0.032                        | 6.60   | 5.12           | -10 18 40   |                                   |
| 0.003                           | 405               | 0.070                        | 6.24   | 4.93           | 20 47 -14   | medial orbital<br>gyrus           |
|                                 |                   | 0.627                        | 5.08   | 4.26           | 24 32 -14   |                                   |
| <0.001                          | 858               | 0.322                        | 5.50   | 4.51           | -30 46 2    | medial/posterior<br>orbital gyrus |
|                                 |                   | 0.690                        | 5.00   | 4.21           | -18 50 8    |                                   |
|                                 |                   | 0.955                        | 4.55   | 3.92           | -30 56 4    |                                   |
| <0.001                          | 640               | 0.400                        | 5.37   | 4.44           | 27 -62 -54  | middle frontal<br>gyrus           |
|                                 |                   | 0.988                        | 4.38   | 3.81           | 33 -67 -56  |                                   |
|                                 |                   | 0.989                        | 4.37   | 3.80           | 20 -68 -56  |                                   |
| 0.003                           | 408               | 0.496                        | 5.24   | 4.36           | -32 -10 -34 | fusiform gyrus                    |
|                                 |                   | 0.658                        | 5.04   | 4.24           | -40 -19 -26 |                                   |
|                                 |                   | 0.976                        | 4.46   | 3.86           | -32 -8 -43  |                                   |
| <0.001                          | 921               | 0.500                        | 5.24   | 4.36           | -10 -76 -43 | cerebellum                        |
|                                 |                   | 0.909                        | 4.67   | 4.00           | -8 -78 -36  |                                   |
|                                 |                   | 0.936                        | 4.61   | 3.96           | -28 -74 -48 |                                   |

35

36 **Supplementary Table 2. Univariate analysis of presented faces with linear parametric**  
37 **modulator in run 1+3,  $p < 0.001$ , uncorrected + cluster-corrected  $p(\text{FWE}) < 0.05$**

| cluster<br>p(FWE-corr) | cluster<br>equivk | peak<br>p(FWE-corr) | peak T | peak<br>equivZ | x,y,z {mm}  | label                       |
|------------------------|-------------------|---------------------|--------|----------------|-------------|-----------------------------|
| <0.001                 | 1742              | 0.000               | 9.11   | 6.21           | -32 22 -2   | anterior insula             |
|                        |                   | 0.974               | 4.48   | 3.88           | -48 17 -10  |                             |
|                        |                   | 0.975               | 4.48   | 3.87           | -45 16 5    |                             |
| <0.001                 | 2713              | 0.000               | 8.65   | 6.04           | 33 23 -4    | anterior insula             |
|                        |                   | 0.002               | 7.78   | 5.68           | 42 20 -6    |                             |
|                        |                   | 0.004               | 7.51   | 5.55           | 34 22 -13   |                             |
| <0.001                 | 4258              | 0.001               | 8.33   | 5.91           | 36 -74 42   | middle occipital<br>gyrus   |
|                        |                   | 0.006               | 7.40   | 5.50           | 38 -43 41   |                             |
|                        |                   | 0.008               | 7.22   | 5.42           | 33 -64 47   |                             |
| <0.001                 | 2706              | 0.001               | 8.00   | 5.77           | 51 23 28    | middle frontal gyrus        |
|                        |                   | 0.003               | 7.64   | 5.61           | 46 32 26    |                             |
|                        |                   | 0.242               | 5.66   | 4.61           | 48 16 30    |                             |
| 0.001                  | 497               | 0.004               | 7.55   | 5.57           | -10 -78 -30 | cerebellum                  |
| <0.001                 | 3149              | 0.012               | 7.07   | 5.35           | 4 -68 48    | precuneus                   |
|                        |                   | 0.354               | 5.46   | 4.49           | 0 -62 40    |                             |
|                        |                   | 0.421               | 5.35   | 4.43           | 6 -66 35    |                             |
| <0.001                 | 2621              | 0.012               | 7.06   | 5.34           | -40 20 26   | middle frotnal gyrus        |
|                        |                   | 0.217               | 5.71   | 4.64           | -50 26 30   |                             |
|                        |                   | 0.346               | 5.47   | 4.50           | -44 5 38    |                             |
| <0.001                 | 2594              | 0.027               | 6.68   | 5.16           | -34 -54 42  | angular gyrus               |
|                        |                   | 0.038               | 6.53   | 5.08           | -34 -44 40  |                             |
|                        |                   | 0.678               | 5.03   | 4.23           | -44 -42 42  |                             |
| <0.001                 | 2597              | 0.117               | 6.01   | 4.81           | 8 18 46     | supplementary<br>motor area |
|                        |                   | 0.173               | 5.83   | 4.70           | 2 30 44     |                             |
|                        |                   | 0.402               | 5.38   | 4.45           | -4 17 48    |                             |
| <0.001                 | 679               | 0.119               | 6.01   | 4.80           | -34 -73 -54 | cerebellum                  |
| <0.001                 | 635               | 0.139               | 5.93   | 4.76           | 9 5 0       | caudate                     |
|                        |                   | 0.957               | 4.55   | 3.92           | 12 14 4     |                             |
|                        |                   | 1.000               | 4.12   | 3.62           | 12 -4 -2    |                             |
| 0.027                  | 292               | 0.212               | 5.73   | 4.65           | 8 -25 -4    | ventral DC                  |
|                        |                   | 0.339               | 5.48   | 4.50           | -3 -30 -2   |                             |
|                        |                   | 0.945               | 4.59   | 3.95           | 12 -12 6    |                             |
| 0.009                  | 367               | 0.352               | 5.46   | 4.49           | 33 -73 -55  | cerebellum                  |
| 0.005                  | 407               | 0.533               | 5.21   | 4.34           | 9 -85 -38   |                             |
|                        |                   | 0.902               | 4.70   | 4.02           | 9 -79 -32   |                             |
|                        |                   | 1.000               | 4.00   | 3.54           | 15 -78 -25  |                             |
| <0.001                 | 758               | 0.621               | 5.10   | 4.27           | -50 41 0    | inferior frontal gyrus      |

|       |     |       |      |      |            |                            |
|-------|-----|-------|------|------|------------|----------------------------|
|       |     | 0.972 | 4.49 | 3.88 | -39 48 5   |                            |
|       |     | 1.000 | 3.91 | 3.47 | -46 52 -6  |                            |
| 0.003 | 443 | 0.717 | 4.98 | 4.20 | 60 -38 -13 | middle temporal gyrus      |
|       |     | 1.000 | 4.09 | 3.61 | 69 -48 -8  |                            |
| 0.014 | 335 | 0.747 | 4.94 | 4.17 | 22 62 -14  | anterior orbital gyrus     |
|       |     | 1.000 | 3.79 | 3.39 | 12 65 -10  |                            |
| 0.066 | 237 | 0.783 | 4.89 | 4.14 | -8 8 -1    | caudate                    |
|       |     | 0.822 | 4.83 | 4.11 | -8 2 5     |                            |
| 0.002 | 471 | 0.818 | 4.84 | 4.11 | 34 2 44    | middle frontal gyrus       |
|       |     | 0.956 | 4.56 | 3.93 | 33 6 54    |                            |
|       |     | 0.995 | 4.31 | 3.76 | 28 12 50   |                            |
| 0.041 | 266 | 0.945 | 4.59 | 3.95 | 2 -60 -42  | cerebellar ventral lobules |
|       |     | 0.994 | 4.32 | 3.77 | -4 -58 -50 |                            |
|       |     | 0.997 | 4.26 | 3.72 | -8 -56 -42 |                            |

38

### 39 **Supplementary Note 1. Results for the Superior Temporal Sulcus (STS)**

40 In addition to the face-sensitive regions in the ventral stream, we explored expectation-dependent  
41 face representations in the superior temporal sulcus (STS). In analogy to the localization of the other  
42 ROIs, we obtained the STS cluster of size  $k = 166$  with a peak at  $[45, -26, -2]$  from the contrast “face  
43 images > scene images” at  $p < 0.001$ , uncorrected and masked with the right superior temporal cortex  
44 from the Oxford Harvard atlas.

45 In the STS, multivariate patterns of presented faces in the localizer did not correlate with multivariate  
46 patterns of expected faces during scene presentation in the test runs (u-shape relationship:  $r = -0.0056$ ,  
47  $Z(29) = -0.3312$ ,  $p = 0.6298$ ; only highly expected face:  $r = -0.0130$ ,  $Z(29) = -0.9620$ ,  $p = 0.8320$ ; graded  
48 face presentations:  $r = -0.0148$ ,  $Z(29) = -0.2995$ ,  $p = 0.6177$ ). The corresponding hypothesis RDMs did  
49 not differ in their relatedness to the reference RDM and the corresponding noise ceiling in the STS was  
50  $[0.0370 \ 0.1296]$ .

51 Multivariate patterns of presented faces in the localizer did also not correlate with multivariate  
52 patterns of presented faces in the test runs (u-shape relationship:  $r = 0.0630$ ,  $Z(29) = 1.6283$ ,  $p =$

0.0517; only highly expected face:  $r = 0.0093$ ,  $Z(29) = 0.6892$ ,  $p = 0.2454$ ; graded face presentations:  $r = -0.0315$ ,  $Z(29) = 0.8384$ ,  $p = 0.7991$ ). The corresponding hypothesis RDMs did not differ in their relatedness to the reference RDM and the corresponding noise ceiling in the STS was [0.0787 0.1500].

Future experimental designs manipulating priors about facial movement, gaze, or emotion may be more powerful to investigate expectation-dependent face representations with respect to these aspects of facial information in the STS <sup>2</sup>.

### Supplementary References

1. Zhen, Z. *et al.* Quantifying interindividual variability and asymmetry of face-selective regions: A probabilistic functional atlas. *NeuroImage* **113**, 13–25 (2015).
2. Furl, N., van Rijsbergen, N. J., Treves, A., Friston, K. J. & Dolan, R. J. Experience-dependent coding of facial expression in superior temporal sulcus. *Proc. Natl. Acad. Sci. U. S. A.* **104**, 13485–9 (2007).
